# Supplementary material for: Two novel diterpenoid heterodimers, Bisebracteolasins A and B, from Euphorbia ebracteolata Hayata, and the cancer chemotherapeutic potential of Bisebracteolasin A
Source: PubMed Central journal article supplement (PMC5674023; doi:10.1038/s41598-017-14637-w), 2017-11-06
Supplement: 41598_2017_14637_MOESM1_ESM.pdf [file 41598_2017_14637_MOESM1_ESM.pdf]

## Supplementary Information

### **Two novel diterpenoid heterodimers, Bisebracteolasins A and B, from *Euphorbia ebracteolata* Hayata, and the cancer chemotherapeutic potential of Bisebracteolasin A**

Wen-Juan Yuan<sup>1,2,3,Δ</sup>, Xiao Ding<sup>1,Δ</sup>, Zhe Wang<sup>1</sup>, Bi-Juan Yang<sup>1</sup>, Xiao-Nian Li<sup>1</sup>, Yu Zhang<sup>1</sup>, Duo-Zhi Chen<sup>1</sup>, Shun-Lin Li<sup>1</sup>, Quan Chen<sup>4</sup>, Ying-Tong Di<sup>1,\*</sup>, Haji Akber Aisa<sup>2,\*</sup>, Xiao-Jiang Hao<sup>1,\*</sup>

<sup>1</sup> State Key Laboratory of Phytochemistry and Plant Resources in West China, Kunming Institute of Botany, Chinese Academy of Sciences, Kunming 650204, P. R. China

<sup>2</sup> Xinjiang Technical Institute of Physics and Chemistry, Chinese Academy of Sciences, Urumqi 830011, Xinjiang, P. R. China

<sup>3</sup> University of Chinese Academy of Sciences, Beijing, 100049, P. R. China

<sup>4</sup> State Key Laboratory of Molecular Oncology, Cancer Institute/Hospital, Peking Union Medical College and Chinese Academy of Medical Sciences, Beijing, 100021, P. R. China.

| No. | Contents                                                                                                 | Page  |
|-----|----------------------------------------------------------------------------------------------------------|-------|
| 1   | Crystallographic data of Bisebracteolasin A ( <b>1</b> )                                                 | 2-15  |
| 2   | <b>Figure S1.</b> MS/MS spectrum of Bisebracteolasin A ( <b>1</b> )                                      | 16    |
| 3   | <b>Figure S2.</b> MS/MS spectrum of Bisebracteolasin B ( <b>2</b> )                                      | 17    |
| 4   | <b>Figure S3</b> $^1\text{H}$ NMR spectrum of Bisebracteolasin A ( <b>1</b> ) in $\text{CDCl}_3-d_1$     | 18    |
| 5   | <b>Figure S4</b> $^{13}\text{C}$ NMR spectrum of Bisebracteolasin A ( <b>1</b> ) in $\text{CDCl}_3-d_1$  | 18    |
| 6   | <b>Figure S5</b> COSY spectrum of Bisebracteolasin A ( <b>1</b> ) in $\text{CDCl}_3-d_1$                 | 19    |
| 7   | <b>Figure S6</b> HSQC spectrum of Bisebracteolasin A ( <b>1</b> ) in $\text{CDCl}_3-d_1$                 | 19    |
| 8   | <b>Figure S7</b> HMBC spectrum of Bisebracteolasin A ( <b>1</b> ) in $\text{CDCl}_3-d_1$                 | 20    |
| 9   | <b>Figure S8</b> ROESY spectrum of Bisebracteolasin A ( <b>1</b> ) in $\text{CDCl}_3-d_1$                | 20    |
| 10  | <b>Figure S9</b> HRESIMS spectrums of Bisebracteolasin A ( <b>1</b> )                                    | 21    |
| 11  | <b>Figure S10</b> UV spectrum of Bisebracteolasin A ( <b>1</b> ) in Methanol                             | 22    |
| 12  | <b>Figure S11</b> IR spectrum of Bisebracteolasin A ( <b>1</b> )                                         | 23    |
| 13  | <b>Figure S12</b> CD spectrum of Bisebracteolasin A ( <b>1</b> )                                         | 24-25 |
| 14  | <b>Figure S13</b> $^1\text{H}$ NMR spectrum of Bisebracteolasin B ( <b>2</b> ) in $\text{CDCl}_3-d_1$    | 26    |
| 15  | <b>Figure S14</b> $^{13}\text{C}$ NMR spectrum of Bisebracteolasin B ( <b>2</b> ) in $\text{CDCl}_3-d_1$ | 26    |
| 16  | <b>Figure S15</b> COSY spectrum of Bisebracteolasin B ( <b>2</b> ) in $\text{CDCl}_3-d_1$                | 27    |
| 17  | <b>Figure S16</b> HSQC spectrum of Bisebracteolasin B ( <b>2</b> ) in $\text{CDCl}_3-d_1$                | 27    |
| 18  | <b>Figure S17</b> HMBC spectrum of Bisebracteolasin B ( <b>2</b> ) in $\text{CDCl}_3-d_1$                | 28    |
| 19  | <b>Figure S18</b> ROESY spectrum of Bisebracteolasin B ( <b>2</b> ) in $\text{CDCl}_3-d_1$               | 28    |
| 20  | <b>Figure S19</b> HRESIMS spectrums of Bisebracteolasin B ( <b>2</b> )                                   | 29    |
| 21  | <b>Figure S20</b> UV spectrum of Bisebracteolasin B ( <b>2</b> ) in Methanol                             | 30    |
| 22  | <b>Figure S21</b> IR spectrum of Bisebracteolasin B ( <b>2</b> )                                         | 31    |
| 23  | <b>Figure S22</b> CD spectrum of Bisebracteolasin B ( <b>2</b> )                                         | 32-33 |

## Crystallographic data of Bisebracteolasin A (1)

Crystals of **1** were used for measurement on a Bruker APEX DUO diffractometer with gphirate monochromater Cu K $\alpha$  radiation. Crystal structures were solved by direct methods with SHELXS-2014, expanded using difference Fourier technique, and refined with full-matrix least-squares on F<sup>2</sup> using SHELXS-2014. Non-hydrogen atoms were refined anisotropically. Hydrogen atoms were placed in idealized positions and refined using a riding model. Crystallographic data for compounds **1** has been deposited in the Cambridge Crystallographic Data Centre (deposition numbers: CCDC 1521406). Copies of these data can be obtained free of charge via [www.ccdc.cam.ac.uk](http://www.ccdc.cam.ac.uk) (or from the Cambridge Crystallographic Data Centre, 12, Union Road, CAMBRIDGE CB2 1EZ, UK.; fax: (+44) 1223-336-033; or [deposit@ccdc.cam.ac.uk](mailto:deposit@ccdc.cam.ac.uk)).

Crystal data for cu\_hyx51\_0m: C<sub>40</sub>H<sub>56</sub>O<sub>8</sub>,  $M = 664.85$ , orthorhombic,  $a = 11.1592(4) \text{ \AA}$ ,  $b = 13.2190(5) \text{ \AA}$ ,  $c = 23.8712(9) \text{ \AA}$ ,  $\alpha = 90.00^\circ$ ,  $\beta = 90.00^\circ$ ,  $\gamma = 90.00^\circ$ ,  $V = 3521.3(2) \text{ \AA}^3$ ,  $T = 100(2) \text{ K}$ , space group  $P212121$ ,  $Z = 4$ ,  $\mu(\text{CuK}\alpha) = 0.689 \text{ mm}^{-1}$ , 16311 reflections measured, 5825 independent reflections ( $R_{int} = 0.0636$ ). The final  $R_I$  values were 0.0623 ( $I > 2\sigma(I)$ ). The final  $wR(F^2)$  values were 0.1730 ( $I > 2\sigma(I)$ ). The final  $R_I$  values were 0.0813 (all data). The final  $wR(F^2)$  values were 0.2186 (all data). The goodness of fit on  $F^2$  was 1.146. Flack parameter = 0.1(3). The Hooft parameter is 0.11(10) for 2372 Bijvoet pairs.

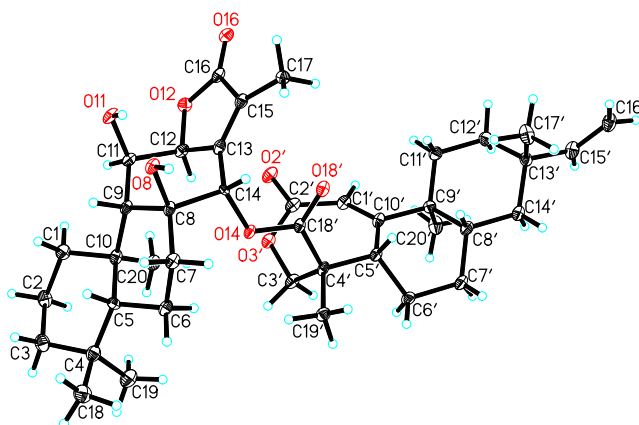

View of a molecule of hyx51 with the atom-labelling scheme.

Displacement ellipsoids are drawn at the 30% probability level.

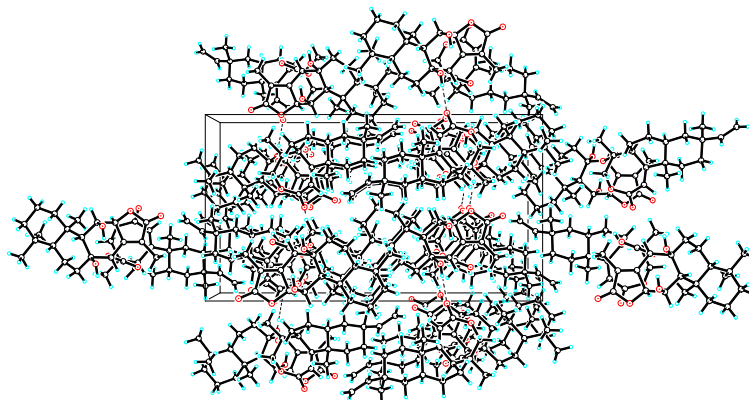

View of the hydrogen-bonded motif of hyx51.

Hydrogen-bonds are shown as dashed lines.

Table 1. Crystal data and structure refinement for hyx51.

|                             |                                                |                 |
|-----------------------------|------------------------------------------------|-----------------|
| Identification code         | cu_hyx51_0m                                    |                 |
| Empirical formula           | C <sub>40</sub> H <sub>56</sub> O <sub>8</sub> |                 |
| Formula weight              | 664.85                                         |                 |
| Temperature                 | 100(2) K                                       |                 |
| Wavelength                  | 1.54178 Å                                      |                 |
| Crystal system, space group | Orthorhombic, P 21 21 21                       |                 |
| Unit cell dimensions        | a = 11.1592(4) Å                               | alpha = 90 deg. |
|                             | b = 13.2190(5) Å                               | beta = 90 deg.  |
|                             | c = 23.8712(9) Å                               | gamma = 90 deg. |
| Volume                      | 3521.3(2) Å <sup>3</sup>                       |                 |
| Z, Calculated density       | 4, 1.254 Mg/m <sup>3</sup>                     |                 |
| Absorption coefficient      | 0.689 mm <sup>-1</sup>                         |                 |
| F(000)                      | 1440                                           |                 |

|                                   |                                             |
|-----------------------------------|---------------------------------------------|
| Crystal size                      | 0.33 x 0.11 x 0.09 mm                       |
| Theta range for data collection   | 3.70 to 69.40 deg.                          |
| Limiting indices                  | -12<=h<=13, -15<=k<=14, -27<=l<=27          |
| Reflections collected / unique    | 16311 / 5825 [R(int) = 0.0636]              |
| Completeness to theta = 69.40     | 93.2 %                                      |
| Absorption correction             | Semi-empirical from equivalents             |
| Max. and min. transmission        | 0.9406 and 0.8046                           |
| Refinement method                 | Full-matrix least-squares on F <sup>2</sup> |
| Data / restraints / parameters    | 5825 / 0 / 443                              |
| Goodness-of-fit on F <sup>2</sup> | 1.146                                       |
| Final R indices [I>2sigma(I)]     | R1 = 0.0623, wR2 = 0.1730                   |
| R indices (all data)              | R1 = 0.0813, wR2 = 0.2186                   |
| Absolute structure parameter      | 0.1(3)                                      |
| Extinction coefficient            | 0.0009(3)                                   |
| Largest diff. peak and hole       | 0.476 and -0.510 e.A <sup>-3</sup>          |

Table 2. Atomic coordinates ( $\times 10^4$ ) and equivalent isotropic displacement parameters ( $\text{\AA}^2 \times 10^3$ ) for hyx51. U(eq) is defined as one third of the trace of the orthogonalized Uij tensor.

|        | x        | y       | z       | U(eq) |
|--------|----------|---------|---------|-------|
| O(14)  | 988(2)   | 2604(2) | 7949(1) | 19(1) |
| O(12)  | -1040(3) | 171(2)  | 7146(1) | 24(1) |
| O(16)  | -1409(2) | 428(2)  | 6234(1) | 27(1) |
| O(11)  | -2812(2) | 960(2)  | 7833(1) | 28(1) |
| O(18') | 1483(2)  | 3227(2) | 7100(1) | 24(1) |
| O(3')  | 2612(2)  | 1027(2) | 7810(1) | 23(1) |
| O(2')  | 2147(3)  | 28(2)   | 7119(1) | 30(1) |
| O(8)   | -2233(2) | 2941(2) | 8075(1) | 21(1) |

|        |          |         |          |       |
|--------|----------|---------|----------|-------|
| C(3)   | -643(4)  | 869(3)  | 10302(2) | 31(1) |
| C(4)   | 103(4)   | 1742(3) | 10052(2) | 27(1) |
| C(5)   | -417(3)  | 2020(3) | 9474(2)  | 20(1) |
| C(10)  | -597(3)  | 1137(3) | 9043(2)  | 22(1) |
| C(9)   | -1388(3) | 1553(2) | 8544(2)  | 20(1) |
| C(8)   | -1082(3) | 2623(2) | 8301(2)  | 18(1) |
| C(14)  | -260(3)  | 2667(3) | 7772(1)  | 15(1) |
| C(18') | 1776(3)  | 2920(2) | 7560(2)  | 18(1) |
| C(4')  | 3067(3)  | 2866(3) | 7764(2)  | 19(1) |
| C(5')  | 3925(3)  | 3054(2) | 7263(2)  | 20(1) |
| C(10') | 4056(3)  | 2182(3) | 6860(2)  | 21(1) |
| C(9')  | 4897(3)  | 2401(3) | 6355(2)  | 20(1) |
| C(8')  | 5290(4)  | 3521(3) | 6373(2)  | 26(1) |
| C(14') | 6053(4)  | 3816(3) | 5862(2)  | 28(1) |
| C(13') | 5434(3)  | 3635(3) | 5302(2)  | 23(1) |
| C(15') | 6359(4)  | 3725(3) | 4844(2)  | 30(1) |
| C(16') | 6307(4)  | 4279(3) | 4382(2)  | 35(1) |
| C(18)  | -48(5)   | 2657(3) | 10447(2) | 36(1) |
| C(6)   | 192(3)   | 2919(3) | 9183(2)  | 23(1) |
| C(7)   | -659(3)  | 3369(3) | 8745(2)  | 22(1) |
| C(13)  | -545(3)  | 1828(3) | 7383(2)  | 21(1) |
| C(12)  | -701(3)  | 792(3)  | 7620(2)  | 22(1) |
| C(16)  | -1121(3) | 772(3)  | 6679(2)  | 23(1) |
| C(15)  | -798(3)  | 1817(3) | 6827(2)  | 22(1) |
| C(17)  | -773(3)  | 2641(3) | 6402(2)  | 23(1) |
| C(11)  | -1663(3) | 777(3)  | 8075(2)  | 21(1) |
| C(1)   | -1349(4) | 318(3)  | 9346(2)  | 27(1) |
| C(2)   | -805(4)  | -13(3)  | 9902(2)  | 30(1) |
| C(20)  | 576(3)   | 667(3)  | 8833(2)  | 26(1) |
| C(3')  | 3304(3)  | 1842(3) | 8049(2)  | 25(1) |
| C(2')  | 2753(4)  | 752(3)  | 7275(2)  | 25(1) |
| C(1')  | 3589(3)  | 1249(3) | 6889(2)  | 23(1) |
| C(11') | 4216(4)  | 2244(3) | 5808(2)  | 26(1) |
| C(12') | 4967(4)  | 2537(3) | 5297(2)  | 28(1) |
| C(7')  | 5897(4)  | 3772(4) | 6925(2)  | 39(1) |
| C(6')  | 5192(3)  | 3397(3) | 7436(2)  | 24(1) |
| C(17') | 4400(4)  | 4370(3) | 5204(2)  | 35(1) |
| C(20') | 5969(4)  | 1676(3) | 6394(2)  | 36(1) |
| C(19') | 3204(3)  | 3699(3) | 8210(2)  | 23(1) |
| C(19)  | 1439(4)  | 1468(3) | 10064(2) | 38(1) |

---

Table 3. Bond lengths [Å] and angles [deg] for hyx51.

---

|               |          |
|---------------|----------|
| O(14)-C(18')  | 1.345(5) |
| O(14)-C(14)   | 1.458(4) |
| O(12)-C(16)   | 1.372(5) |
| O(12)-C(12)   | 1.448(5) |
| O(16)-C(16)   | 1.200(5) |
| O(11)-C(11)   | 1.427(4) |
| O(11)-H(11)   | 0.8400   |
| O(18')-C(18') | 1.216(5) |
| O(3')-C(2')   | 1.337(5) |
| O(3')-C(3')   | 1.444(4) |
| O(2')-C(2')   | 1.230(5) |
| O(8)-C(8)     | 1.455(4) |
| O(8)-H(8)     | 0.8400   |
| C(3)-C(2)     | 1.517(6) |
| C(3)-C(4)     | 1.542(6) |
| C(3)-H(3A)    | 0.9900   |
| C(3)-H(3B)    | 0.9900   |
| C(4)-C(19)    | 1.534(6) |
| C(4)-C(18)    | 1.543(6) |
| C(4)-C(5)     | 1.543(5) |
| C(5)-C(6)     | 1.535(5) |
| C(5)-C(10)    | 1.569(5) |
| C(5)-H(5)     | 1.0000   |
| C(10)-C(20)   | 1.533(5) |
| C(10)-C(1)    | 1.549(5) |
| C(10)-C(9)    | 1.582(5) |
| C(9)-C(11)    | 1.549(5) |
| C(9)-C(8)     | 1.566(4) |
| C(9)-H(9)     | 1.0000   |
| C(8)-C(7)     | 1.522(5) |
| C(8)-C(14)    | 1.562(5) |
| C(14)-C(13)   | 1.480(5) |
| C(14)-H(14)   | 1.0000   |
| C(18')-C(4')  | 1.522(5) |
| C(4')-C(3')   | 1.537(5) |
| C(4')-C(19')  | 1.540(5) |
| C(4')-C(5')   | 1.552(5) |
| C(5')-C(10')  | 1.508(5) |
| C(5')-C(6')   | 1.542(5) |
| C(5')-H(5')   | 1.0000   |
| C(10')-C(1')  | 1.341(5) |

|               |          |
|---------------|----------|
| C(10')-C(9')  | 1.556(5) |
| C(9')-C(11')  | 1.524(6) |
| C(9')-C(20')  | 1.536(5) |
| C(9')-C(8')   | 1.544(5) |
| C(8')-C(7')   | 1.518(6) |
| C(8')-C(14')  | 1.538(6) |
| C(8')-H(8')   | 1.0000   |
| C(14')-C(13') | 1.526(6) |
| C(14')-H(14A) | 0.9900   |
| C(14')-H(14B) | 0.9900   |
| C(13')-C(15') | 1.507(6) |
| C(13')-C(17') | 1.526(6) |
| C(13')-C(12') | 1.542(5) |
| C(15')-C(16') | 1.326(6) |
| C(15')-H(15') | 0.9500   |
| C(16')-H(16A) | 0.9500   |
| C(16')-H(16B) | 0.9500   |
| C(18)-H(18A)  | 0.9800   |
| C(18)-H(18B)  | 0.9800   |
| C(18)-H(18C)  | 0.9800   |
| C(6)-C(7)     | 1.532(5) |
| C(6)-H(6A)    | 0.9900   |
| C(6)-H(6B)    | 0.9900   |
| C(7)-H(7A)    | 0.9900   |
| C(7)-H(7B)    | 0.9900   |
| C(13)-C(15)   | 1.357(6) |
| C(13)-C(12)   | 1.492(5) |
| C(12)-C(11)   | 1.527(6) |
| C(12)-H(12)   | 1.0000   |
| C(16)-C(15)   | 1.471(5) |
| C(15)-C(17)   | 1.490(5) |
| C(17)-H(17A)  | 0.9800   |
| C(17)-H(17B)  | 0.9800   |
| C(17)-H(17C)  | 0.9800   |
| C(11)-H(11A)  | 1.0000   |
| C(1)-C(2)     | 1.525(6) |
| C(1)-H(1A)    | 0.9900   |
| C(1)-H(1B)    | 0.9900   |
| C(2)-H(2A)    | 0.9900   |
| C(2)-H(2B)    | 0.9900   |
| C(20)-H(20A)  | 0.9800   |
| C(20)-H(20B)  | 0.9800   |
| C(20)-H(20C)  | 0.9800   |
| C(3')-H(3'1)  | 0.9900   |



|                   |          |
|-------------------|----------|
| C(3')-H(3'2)      | 0.9900   |
| C(2')-C(1')       | 1.467(6) |
| C(1')-H(1')       | 0.9500   |
| C(11')-C(12')     | 1.531(6) |
| C(11')-H(11B)     | 0.9900   |
| C(11')-H(11C)     | 0.9900   |
| C(12')-H(12A)     | 0.9900   |
| C(12')-H(12B)     | 0.9900   |
| C(7')-C(6')       | 1.534(6) |
| C(7')-H(7'1)      | 0.9900   |
| C(7')-H(7'2)      | 0.9900   |
| C(6')-H(6'1)      | 0.9900   |
| C(6')-H(6'2)      | 0.9900   |
| C(17')-H(17D)     | 0.9800   |
| C(17')-H(17E)     | 0.9800   |
| C(17')-H(17F)     | 0.9800   |
| C(20')-H(20D)     | 0.9800   |
| C(20')-H(20E)     | 0.9800   |
| C(20')-H(20F)     | 0.9800   |
| C(19')-H(19A)     | 0.9800   |
| C(19')-H(19B)     | 0.9800   |
| C(19')-H(19C)     | 0.9800   |
| C(19')-H(19D)     | 0.9800   |
| C(19')-H(19E)     | 0.9800   |
| C(19')-H(19F)     | 0.9800   |
|                   |          |
| C(18)-O(14)-C(14) | 114.0(3) |
| C(16)-O(12)-C(12) | 108.9(3) |
| C(11)-O(11)-H(11) | 109.5    |
| C(2')-O(3')-C(3') | 121.1(3) |
| C(8)-O(8)-H(8)    | 109.5    |
| C(2)-C(3)-C(4)    | 113.5(4) |
| C(2)-C(3)-H(3A)   | 108.9    |
| C(4)-C(3)-H(3A)   | 108.9    |
| C(2)-C(3)-H(3B)   | 108.9    |
| C(4)-C(3)-H(3B)   | 108.9    |
| H(3A)-C(3)-H(3B)  | 107.7    |
| C(19)-C(4)-C(3)   | 110.0(3) |
| C(19)-C(4)-C(18)  | 106.3(4) |
| C(3)-C(4)-C(18)   | 107.0(4) |
| C(19)-C(4)-C(5)   | 116.0(4) |
| C(3)-C(4)-C(5)    | 108.7(3) |
| C(18)-C(4)-C(5)   | 108.6(3) |
| C(6)-C(5)-C(4)    | 115.0(3) |

|                     |          |
|---------------------|----------|
| C(6)-C(5)-C(10)     | 109.7(3) |
| C(4)-C(5)-C(10)     | 117.2(3) |
| C(6)-C(5)-H(5)      | 104.5    |
| C(4)-C(5)-H(5)      | 104.5    |
| C(10)-C(5)-H(5)     | 104.5    |
| C(20)-C(10)-C(1)    | 109.4(3) |
| C(20)-C(10)-C(5)    | 114.0(3) |
| C(1)-C(10)-C(5)     | 106.4(3) |
| C(20)-C(10)-C(9)    | 111.8(3) |
| C(1)-C(10)-C(9)     | 107.0(3) |
| C(5)-C(10)-C(9)     | 107.8(3) |
| C(11)-C(9)-C(8)     | 112.0(3) |
| C(11)-C(9)-C(10)    | 115.1(3) |
| C(8)-C(9)-C(10)     | 118.1(3) |
| C(11)-C(9)-H(9)     | 103.0    |
| C(8)-C(9)-H(9)      | 103.0    |
| C(10)-C(9)-H(9)     | 103.0    |
| O(8)-C(8)-C(7)      | 110.2(3) |
| O(8)-C(8)-C(14)     | 102.0(3) |
| C(7)-C(8)-C(14)     | 110.9(3) |
| O(8)-C(8)-C(9)      | 101.9(3) |
| C(7)-C(8)-C(9)      | 113.3(3) |
| C(14)-C(8)-C(9)     | 117.4(3) |
| O(14)-C(14)-C(13)   | 110.1(3) |
| O(14)-C(14)-C(8)    | 108.9(3) |
| C(13)-C(14)-C(8)    | 110.7(3) |
| O(14)-C(14)-H(14)   | 109.0    |
| C(13)-C(14)-H(14)   | 109.0    |
| C(8)-C(14)-H(14)    | 109.0    |
| O(18')-C(18')-O(14) | 123.4(3) |
| O(18')-C(18')-C(4') | 124.0(3) |
| O(14)-C(18')-C(4')  | 112.6(3) |
| C(18')-C(4')-C(3')  | 110.2(3) |
| C(18')-C(4')-C(19') | 106.4(3) |
| C(3')-C(4')-C(19')  | 107.8(3) |
| C(18')-C(4')-C(5')  | 109.3(3) |
| C(3')-C(4')-C(5')   | 112.1(3) |
| C(19')-C(4')-C(5')  | 110.9(3) |
| C(10')-C(5')-C(6')  | 107.9(3) |
| C(10')-C(5')-C(4')  | 115.4(3) |
| C(6')-C(5')-C(4')   | 114.0(3) |
| C(10')-C(5')-H(5')  | 106.3    |
| C(6')-C(5')-H(5')   | 106.3    |
| C(4')-C(5')-H(5')   | 106.3    |

|                      |          |
|----------------------|----------|
| C(1')-C(10')-C(5')   | 129.3(4) |
| C(1')-C(10')-C(9')   | 116.5(3) |
| C(5')-C(10')-C(9')   | 114.2(3) |
| C(11')-C(9')-C(20')  | 110.8(3) |
| C(11')-C(9')-C(8')   | 107.3(3) |
| C(20')-C(9')-C(8')   | 112.1(3) |
| C(11')-C(9')-C(10')  | 109.7(3) |
| C(20')-C(9')-C(10')  | 107.9(3) |
| C(8')-C(9')-C(10')   | 109.1(3) |
| C(7')-C(8')-C(14')   | 112.6(3) |
| C(7')-C(8')-C(9')    | 111.1(4) |
| C(14')-C(8')-C(9')   | 112.2(3) |
| C(7')-C(8')-H(8')    | 106.8    |
| C(14')-C(8')-H(8')   | 106.8    |
| C(9')-C(8')-H(8')    | 106.8    |
| C(13')-C(14')-C(8')  | 113.9(3) |
| C(13')-C(14')-H(14A) | 108.8    |
| C(8')-C(14')-H(14A)  | 108.8    |
| C(13')-C(14')-H(14B) | 108.8    |
| C(8')-C(14')-H(14B)  | 108.8    |
| H(14A)-C(14')-H(14B) | 107.7    |
| C(15')-C(13')-C(14') | 108.2(3) |
| C(15')-C(13')-C(17') | 110.9(3) |
| C(14')-C(13')-C(17') | 112.1(4) |
| C(15')-C(13')-C(12') | 107.5(3) |
| C(14')-C(13')-C(12') | 107.9(3) |
| C(17')-C(13')-C(12') | 110.1(4) |
| C(16')-C(15')-C(13') | 128.1(4) |
| C(16')-C(15')-H(15') | 116.0    |
| C(13')-C(15')-H(15') | 116.0    |
| C(15')-C(16')-H(16A) | 120.0    |
| C(15')-C(16')-H(16B) | 120.0    |
| H(16A)-C(16')-H(16B) | 120.0    |
| C(4)-C(18)-H(18A)    | 109.5    |
| C(4)-C(18)-H(18B)    | 109.5    |
| H(18A)-C(18)-H(18B)  | 109.5    |
| C(4)-C(18)-H(18C)    | 109.5    |
| H(18A)-C(18)-H(18C)  | 109.5    |
| H(18B)-C(18)-H(18C)  | 109.5    |
| C(7)-C(6)-C(5)       | 109.5(3) |
| C(7)-C(6)-H(6A)      | 109.8    |
| C(5)-C(6)-H(6A)      | 109.8    |
| C(7)-C(6)-H(6B)      | 109.8    |
| C(5)-C(6)-H(6B)      | 109.8    |

|                     |          |
|---------------------|----------|
| H(6A)-C(6)-H(6B)    | 108.2    |
| C(8)-C(7)-C(6)      | 114.6(3) |
| C(8)-C(7)-H(7A)     | 108.6    |
| C(6)-C(7)-H(7A)     | 108.6    |
| C(8)-C(7)-H(7B)     | 108.6    |
| C(6)-C(7)-H(7B)     | 108.6    |
| H(7A)-C(7)-H(7B)    | 107.6    |
| C(15)-C(13)-C(14)   | 131.8(3) |
| C(15)-C(13)-C(12)   | 109.7(3) |
| C(14)-C(13)-C(12)   | 118.3(3) |
| O(12)-C(12)-C(13)   | 104.8(3) |
| O(12)-C(12)-C(11)   | 111.3(3) |
| C(13)-C(12)-C(11)   | 111.4(3) |
| O(12)-C(12)-H(12)   | 109.8    |
| C(13)-C(12)-H(12)   | 109.8    |
| C(11)-C(12)-H(12)   | 109.8    |
| O(16)-C(16)-O(12)   | 121.2(3) |
| O(16)-C(16)-C(15)   | 129.4(4) |
| O(12)-C(16)-C(15)   | 109.4(3) |
| C(13)-C(15)-C(16)   | 107.2(3) |
| C(13)-C(15)-C(17)   | 130.9(4) |
| C(16)-C(15)-C(17)   | 121.9(4) |
| C(15)-C(17)-H(17A)  | 109.5    |
| C(15)-C(17)-H(17B)  | 109.5    |
| H(17A)-C(17)-H(17B) | 109.5    |
| C(15)-C(17)-H(17C)  | 109.5    |
| H(17A)-C(17)-H(17C) | 109.5    |
| H(17B)-C(17)-H(17C) | 109.5    |
| O(11)-C(11)-C(12)   | 110.0(3) |
| O(11)-C(11)-C(9)    | 111.0(3) |
| C(12)-C(11)-C(9)    | 111.4(3) |
| O(11)-C(11)-H(11A)  | 108.1    |
| C(12)-C(11)-H(11A)  | 108.1    |
| C(9)-C(11)-H(11A)   | 108.1    |
| C(2)-C(1)-C(10)     | 113.1(3) |
| C(2)-C(1)-H(1A)     | 109.0    |
| C(10)-C(1)-H(1A)    | 109.0    |
| C(2)-C(1)-H(1B)     | 109.0    |
| C(10)-C(1)-H(1B)    | 109.0    |
| H(1A)-C(1)-H(1B)    | 107.8    |
| C(3)-C(2)-C(1)      | 111.9(3) |
| C(3)-C(2)-H(2A)     | 109.2    |
| C(1)-C(2)-H(2A)     | 109.2    |
| C(3)-C(2)-H(2B)     | 109.2    |

|                      |          |
|----------------------|----------|
| C(1)-C(2)-H(2B)      | 109.2    |
| H(2A)-C(2)-H(2B)     | 107.9    |
| C(10)-C(20)-H(20A)   | 109.5    |
| C(10)-C(20)-H(20B)   | 109.5    |
| H(20A)-C(20)-H(20B)  | 109.5    |
| C(10)-C(20)-H(20C)   | 109.5    |
| H(20A)-C(20)-H(20C)  | 109.5    |
| H(20B)-C(20)-H(20C)  | 109.5    |
| O(3')-C(3')-C(4')    | 113.0(3) |
| O(3')-C(3')-H(3'1)   | 109.0    |
| C(4')-C(3')-H(3'1)   | 109.0    |
| O(3')-C(3')-H(3'2)   | 109.0    |
| C(4')-C(3')-H(3'2)   | 109.0    |
| H(3'1)-C(3')-H(3'2)  | 107.8    |
| O(2')-C(2')-O(3')    | 115.8(4) |
| O(2')-C(2')-C(1')    | 120.5(4) |
| O(3')-C(2')-C(1')    | 123.7(3) |
| C(10')-C(1')-C(2')   | 133.7(4) |
| C(10')-C(1')-H(1')   | 113.1    |
| C(2')-C(1')-H(1')    | 113.1    |
| C(9')-C(11')-C(12')  | 112.0(3) |
| C(9')-C(11')-H(11B)  | 109.2    |
| C(12')-C(11')-H(11B) | 109.2    |
| C(9')-C(11')-H(11C)  | 109.2    |
| C(12')-C(11')-H(11C) | 109.2    |
| H(11B)-C(11')-H(11C) | 107.9    |
| C(11')-C(12')-C(13') | 114.7(3) |
| C(11')-C(12')-H(12A) | 108.6    |
| C(13')-C(12')-H(12A) | 108.6    |
| C(11')-C(12')-H(12B) | 108.6    |
| C(13')-C(12')-H(12B) | 108.6    |
| H(12A)-C(12')-H(12B) | 107.6    |
| C(8')-C(7')-C(6')    | 113.0(3) |
| C(8')-C(7')-H(7'1)   | 109.0    |
| C(6')-C(7')-H(7'1)   | 109.0    |
| C(8')-C(7')-H(7'2)   | 109.0    |
| C(6')-C(7')-H(7'2)   | 109.0    |
| H(7'1)-C(7')-H(7'2)  | 107.8    |
| C(7')-C(6')-C(5')    | 110.6(3) |
| C(7')-C(6')-H(6'1)   | 109.5    |
| C(5')-C(6')-H(6'1)   | 109.5    |
| C(7')-C(6')-H(6'2)   | 109.5    |
| C(5')-C(6')-H(6'2)   | 109.5    |
| H(6'1)-C(6')-H(6'2)  | 108.1    |

|                      |       |
|----------------------|-------|
| C(13')-C(17')-H(17D) | 109.5 |
| C(13')-C(17')-H(17E) | 109.5 |
| H(17D)-C(17')-H(17E) | 109.5 |
| C(13')-C(17')-H(17F) | 109.5 |
| H(17D)-C(17')-H(17F) | 109.5 |
| H(17E)-C(17')-H(17F) | 109.5 |
| C(9')-C(20')-H(20D)  | 109.5 |
| C(9')-C(20')-H(20E)  | 109.5 |
| H(20D)-C(20')-H(20E) | 109.5 |
| C(9')-C(20')-H(20F)  | 109.5 |
| H(20D)-C(20')-H(20F) | 109.5 |
| H(20E)-C(20')-H(20F) | 109.5 |
| C(4')-C(19')-H(19A)  | 109.5 |
| C(4')-C(19')-H(19B)  | 109.5 |
| H(19A)-C(19')-H(19B) | 109.5 |
| C(4')-C(19')-H(19C)  | 109.5 |
| H(19A)-C(19')-H(19C) | 109.5 |
| H(19B)-C(19')-H(19C) | 109.5 |
| C(4)-C(19)-H(19D)    | 109.5 |
| C(4)-C(19)-H(19E)    | 109.5 |
| H(19D)-C(19)-H(19E)  | 109.5 |
| C(4)-C(19)-H(19F)    | 109.5 |
| H(19D)-C(19)-H(19F)  | 109.5 |
| H(19E)-C(19)-H(19F)  | 109.5 |

---

Symmetry transformations used to generate equivalent atoms:

Table 4. Anisotropic displacement parameters ( $\text{\AA}^2 \times 10^3$ ) for hyx51. The anisotropic displacement factor exponent takes the form:  $-2 \pi^2 [ h^2 a^{*2} U_{11} + \dots + 2 h k a^* b^* U_{12} ]$

|        | U11   | U22   | U33   | U23   | U13   | U12   |
|--------|-------|-------|-------|-------|-------|-------|
| O(14)  | 13(1) | 19(1) | 26(2) | 5(1)  | -1(1) | -1(1) |
| O(12)  | 27(1) | 19(1) | 27(2) | -4(1) | 1(1)  | -2(1) |
| O(16)  | 23(1) | 26(1) | 31(2) | -3(1) | -2(1) | -4(1) |
| O(11)  | 15(1) | 27(1) | 42(2) | 1(1)  | -4(1) | -4(1) |
| O(18') | 19(1) | 21(1) | 32(2) | 4(1)  | 2(1)  | 0(1)  |
| O(3')  | 22(1) | 15(1) | 32(2) | -1(1) | 1(1)  | 1(1)  |
| O(2')  | 28(2) | 16(1) | 47(2) | -2(1) | -2(1) | -4(1) |
| O(8)   | 15(1) | 18(1) | 31(2) | 4(1)  | -1(1) | 2(1)  |
| C(3)   | 36(2) | 27(2) | 31(2) | 3(2)  | 6(2)  | 0(2)  |
| C(4)   | 25(2) | 24(2) | 31(2) | 3(2)  | 0(2)  | -1(2) |
| C(5)   | 24(2) | 21(2) | 14(2) | 0(1)  | -1(1) | 0(1)  |
| C(10)  | 20(2) | 18(2) | 29(2) | 6(2)  | 2(2)  | 0(1)  |
| C(9)   | 16(2) | 17(2) | 26(2) | 5(1)  | -1(2) | -2(1) |
| C(8)   | 13(2) | 17(2) | 25(2) | 4(1)  | 2(2)  | 2(1)  |
| C(14)  | 16(2) | 19(2) | 10(2) | 3(1)  | -1(1) | -2(1) |
| C(18') | 18(2) | 12(1) | 25(2) | 4(1)  | 1(2)  | 0(1)  |
| C(4')  | 12(2) | 18(2) | 27(2) | -4(1) | 5(1)  | 0(1)  |
| C(5')  | 16(2) | 18(2) | 26(2) | 2(1)  | -1(1) | -1(1) |
| C(10') | 10(2) | 19(2) | 33(2) | 3(2)  | 2(1)  | 4(1)  |
| C(9')  | 17(2) | 21(2) | 22(2) | -2(2) | 1(2)  | 2(1)  |
| C(8')  | 21(2) | 24(2) | 32(2) | 2(2)  | -2(2) | -6(1) |
| C(14') | 23(2) | 32(2) | 30(2) | 1(2)  | 3(2)  | -8(2) |
| C(13') | 22(2) | 23(2) | 25(2) | 6(2)  | 0(2)  | 2(2)  |
| C(15') | 20(2) | 27(2) | 43(3) | 3(2)  | 8(2)  | 6(2)  |
| C(16') | 24(2) | 31(2) | 49(3) | 7(2)  | 5(2)  | 1(2)  |
| C(18)  | 44(3) | 28(2) | 34(3) | 5(2)  | -2(2) | -3(2) |
| C(6)   | 20(2) | 17(2) | 32(2) | 0(2)  | 1(2)  | -2(1) |
| C(7)   | 21(2) | 16(2) | 30(2) | 1(1)  | 0(2)  | 2(1)  |
| C(13)  | 14(2) | 19(2) | 30(2) | -1(2) | 3(2)  | 2(1)  |
| C(12)  | 18(2) | 18(2) | 29(2) | -6(2) | 0(2)  | 0(1)  |
| C(16)  | 14(2) | 22(2) | 33(2) | -1(2) | 1(2)  | 0(1)  |
| C(15)  | 14(2) | 22(2) | 31(2) | 2(2)  | 1(2)  | 2(1)  |
| C(17)  | 24(2) | 24(2) | 22(2) | 1(2)  | -2(2) | -1(2) |
| C(11)  | 17(2) | 18(2) | 28(2) | 1(1)  | -4(2) | -2(1) |
| C(1)   | 32(2) | 19(2) | 30(2) | 1(2)  | 0(2)  | -3(2) |
| C(2)   | 37(2) | 20(2) | 32(3) | 9(2)  | 4(2)  | 0(2)  |
| C(20)  | 20(2) | 24(2) | 32(2) | 1(2)  | 2(2)  | 4(2)  |

|        |       |       |       |       |       |        |
|--------|-------|-------|-------|-------|-------|--------|
| C(3')  | 20(2) | 18(2) | 36(2) | 1(2)  | -3(2) | 0(1)   |
| C(2')  | 22(2) | 14(2) | 39(2) | -2(2) | -4(2) | 3(1)   |
| C(1')  | 20(2) | 17(2) | 31(2) | -5(2) | 2(2)  | 2(1)   |
| C(11') | 29(2) | 22(2) | 28(2) | 0(2)  | -2(2) | -5(2)  |
| C(12') | 34(2) | 24(2) | 28(2) | 1(2)  | -1(2) | -2(2)  |
| C(7')  | 30(2) | 55(3) | 32(3) | -3(2) | 2(2)  | -24(2) |
| C(6')  | 15(2) | 29(2) | 28(2) | -1(2) | -2(2) | -1(2)  |
| C(17') | 30(2) | 34(2) | 41(3) | 14(2) | 9(2)  | 14(2)  |
| C(20') | 23(2) | 38(2) | 46(3) | 13(2) | 8(2)  | 13(2)  |
| C(19') | 20(2) | 24(2) | 27(2) | -4(2) | 0(2)  | 0(2)   |
| C(19)  | 28(2) | 37(2) | 48(3) | 2(2)  | -2(2) | 0(2)   |

---



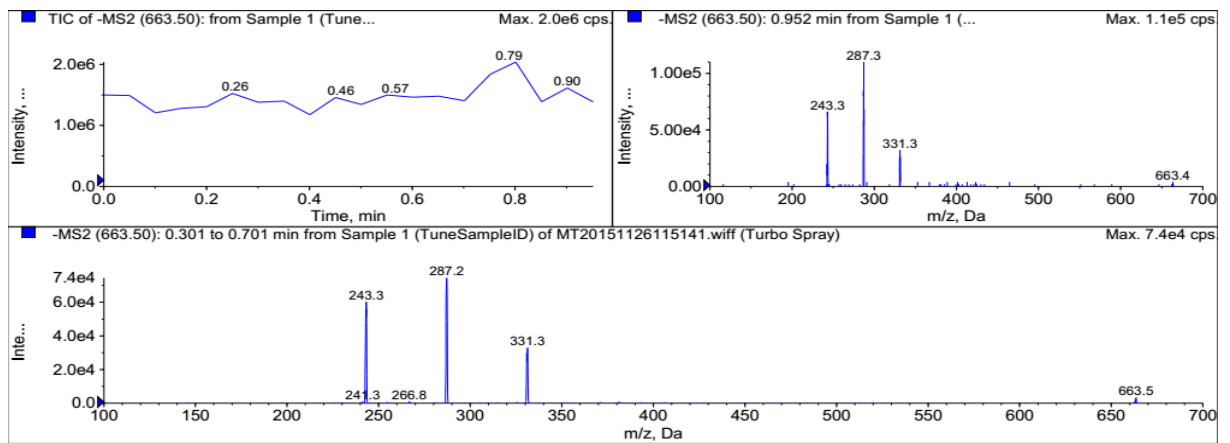

**Figure S1.** MS/MS spectrum of Bisbracteolasin A (1)

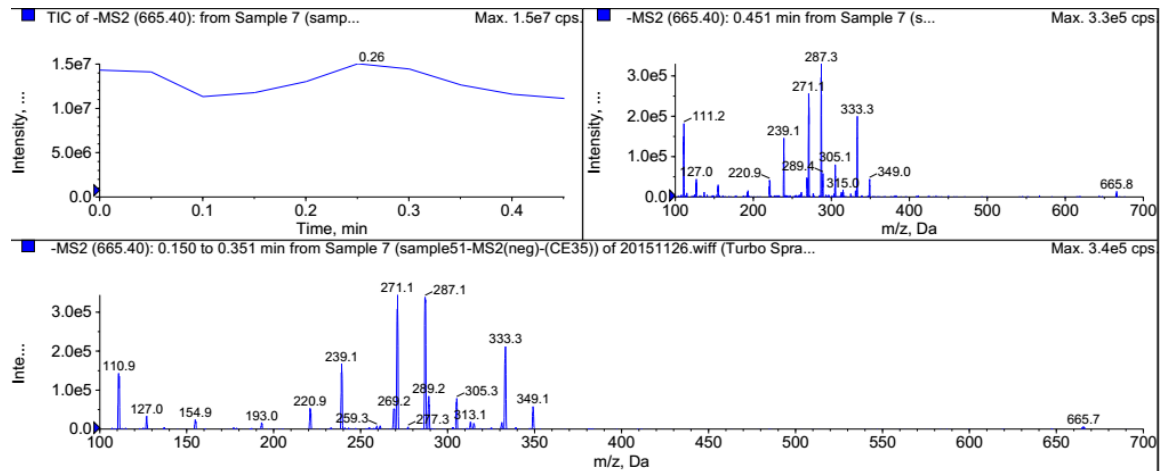

**Figure S2.** MS/MS spectrum of Bisebracteolasin B (2)

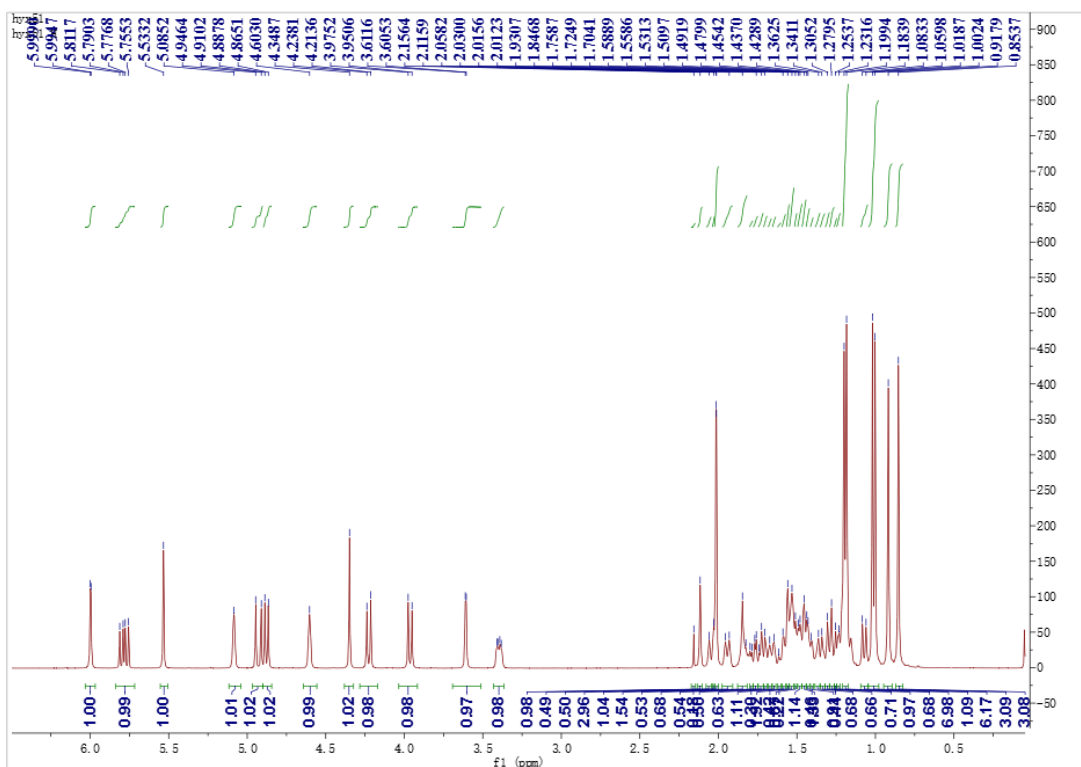

S3  $^1\text{H}$  NMR spectrum of Bisebracteolasin A (1) in  $\text{CDCl}_3\text{-}d_1$

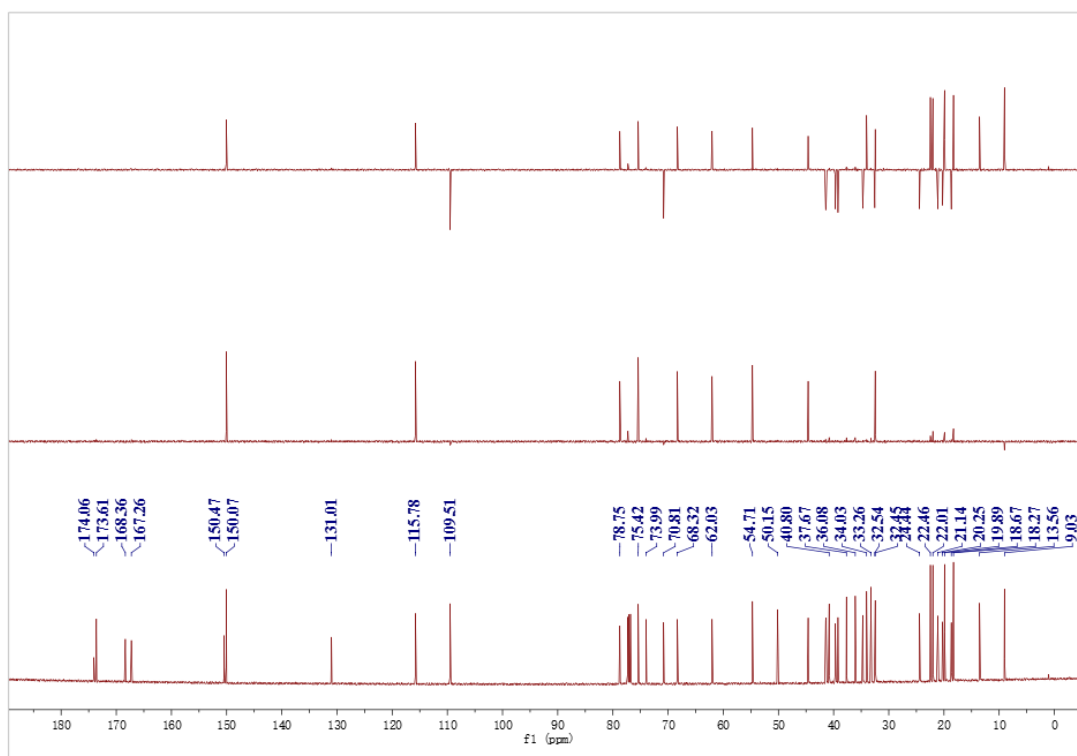

S4  $^{13}\text{C}$  NMR spectrum of Bisebracteolasin A (1) in  $\text{CDCl}_3\text{-}d_1$

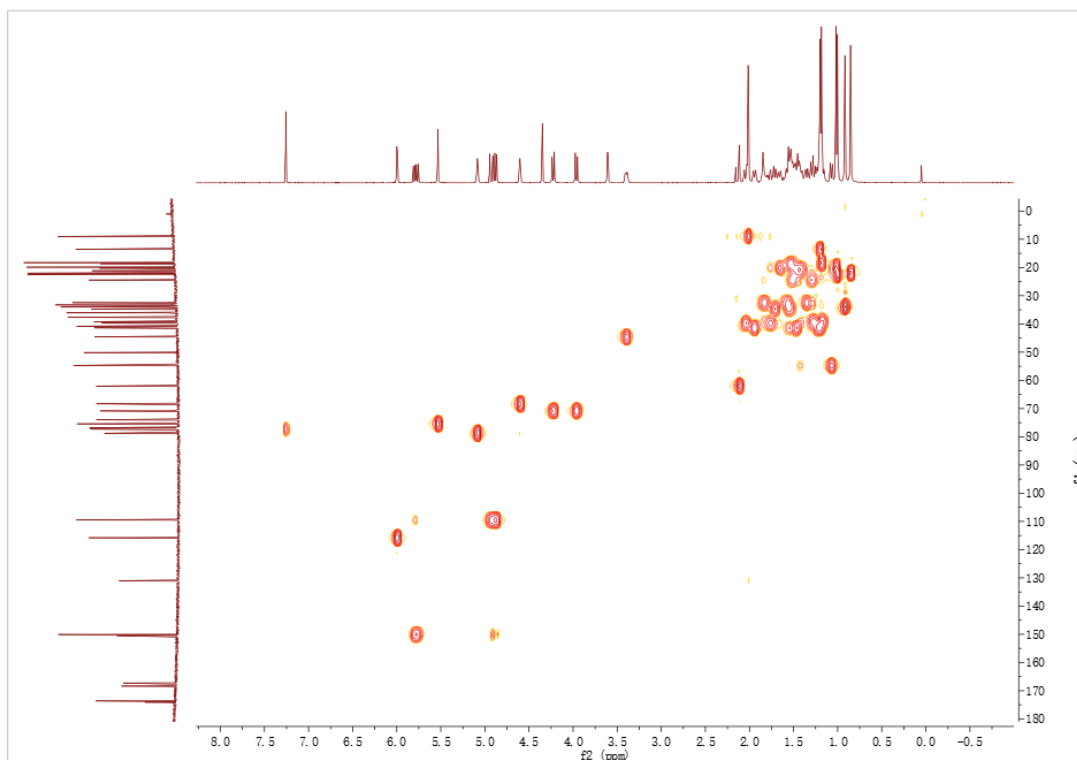

**S5 HSQC spectrum of Bisebracteolasin A (1) in CDCl<sub>3</sub>-d<sub>1</sub>**

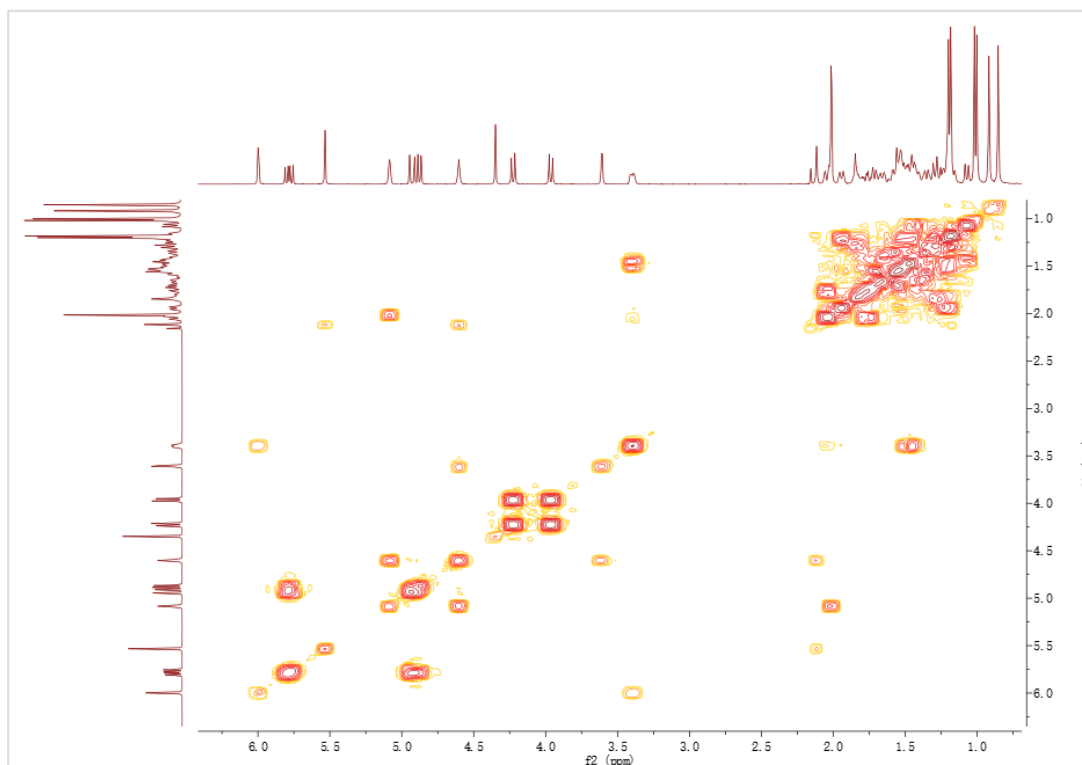

**S6 COSY spectrum of Bisebracteolasin A (1) in CDCl<sub>3</sub>-d<sub>1</sub>**

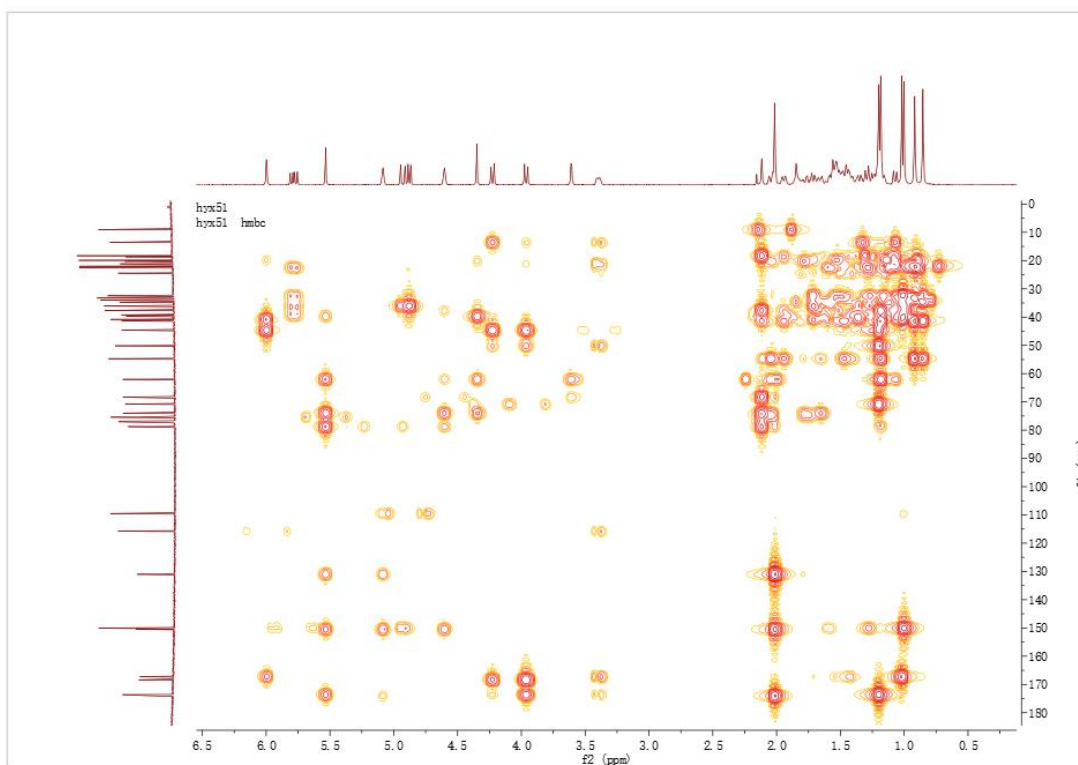

**S7 HMBC spectrum of Bisebracteolasin A (1) in  $CDCl_3-d_1$**

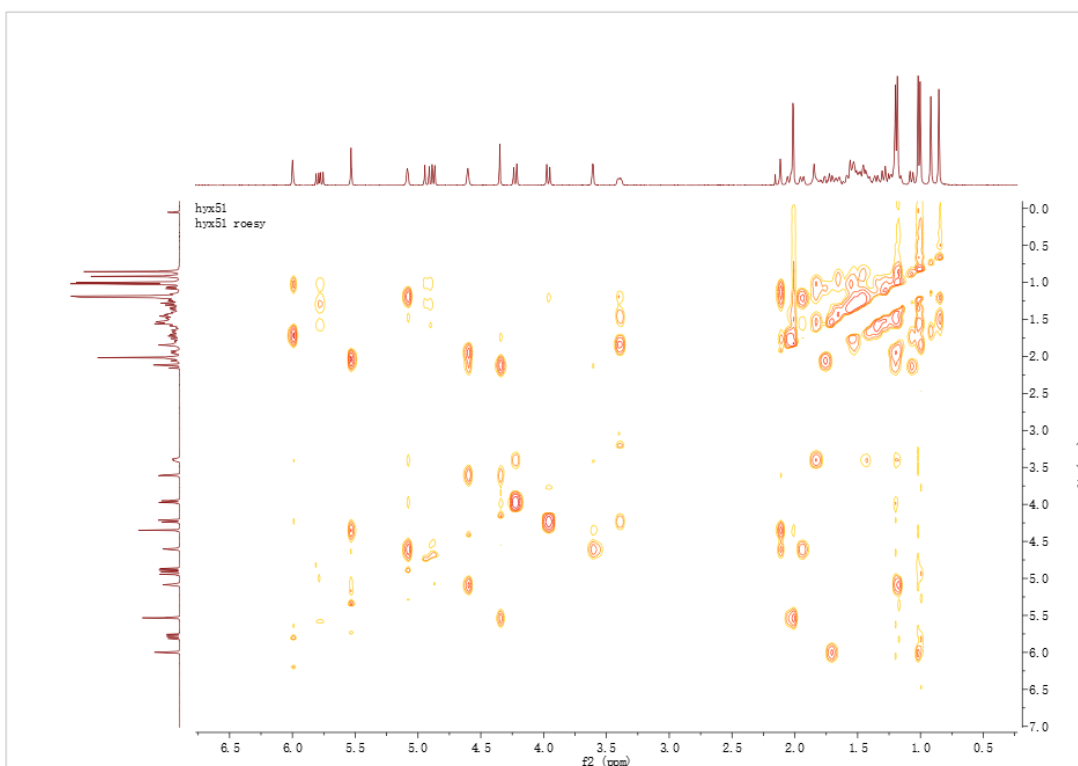

**S8 ROESY spectrum of Bisebracteolasin A (1) in  $CDCl_3-d_1$**

## Qualitative Analysis Report

|                        |              |               |                        |
|------------------------|--------------|---------------|------------------------|
| Data Filename          | hyx51.d      | Sample Name   | hyx51                  |
| Sample Type            | Sample       | Position      | P1-B8                  |
| Instrument Name        | Instrument 1 | User Name     |                        |
| Acq Method             | SIBU.m       | Acquired Time | 10/14/2015 10:35:52 AM |
| IRM Calibration Status | XXXXXXXXXX   | DA Method     | ESI+.m                 |
| Comment                |              |               |                        |

|                |                             |       |
|----------------|-----------------------------|-------|
| Sample Group   |                             | Info. |
| Acquisition SW | 6200 series TOF/6500 series |       |
| Version        | Q-TOF B.05.01 (B5125.2)     |       |

### User Spectra

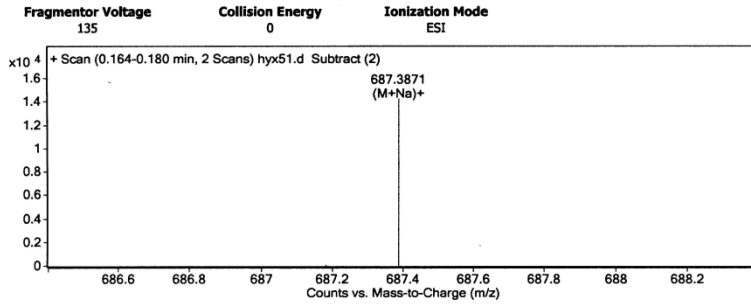

#### Peak List

| m/z      | z | Abund    | Formula    | Ion     |
|----------|---|----------|------------|---------|
| 385.2189 | 2 | 2914     |            |         |
| 393.207  | 2 | 4518.94  |            |         |
| 682.4315 | 1 | 19883.62 |            |         |
| 683.4362 | 1 | 8703.2   |            |         |
| 687.3871 | 1 | 14246.87 | C40 H56 O8 | (M+Na)+ |
| 688.3904 | 1 | 5899.63  | C40 H56 O8 | (M+Na)+ |
| 703.3615 | 1 | 14612.67 |            |         |
| 704.3647 | 1 | 6210.6   |            |         |

#### Formula Calculator Element Limits

| Element | Min | Max |
|---------|-----|-----|
| C       | 3   | 60  |
| H       | 0   | 120 |
| O       | 0   | 30  |

#### Formula Calculator Results

| Formula    | CalculatedMass | CalculatedMz | Mz       | Diff. (mDa) | Diff. (ppm) | DBE     |
|------------|----------------|--------------|----------|-------------|-------------|---------|
| C40 H56 O8 | 664.3975       | 687.3867     | 687.3871 | -0.3        | -0.5        | 13.0000 |

--- End Of Report ---

## S9 HRESIMS spectrums of Bisebracteolasin A (1)

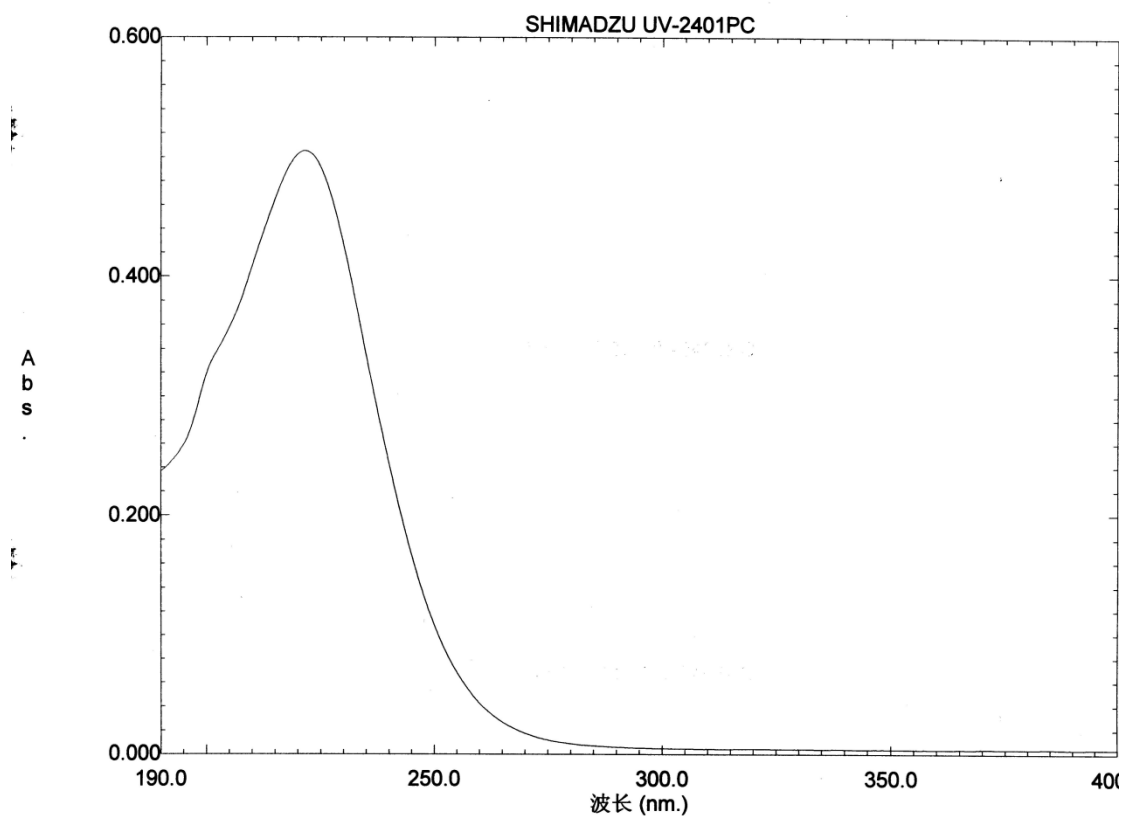

文件名: HXY51

HXY51

创建于: 14:21 15-10-21

样品浓度: 0.0158毫克/毫升  $\rightarrow$  mol/L

数据: 原始

溶剂: 甲醇

测量模式: Abs.  
扫描速度: 中速  
狭缝: 5.0  
采样间隔: 0.2

| 否. | 波长 (nm.) | Abs.   |
|----|----------|--------|
| 1  | 221.60   | 0.5051 |

$\rightarrow$  (mol/L)

### S10 UV spectrum of Bisebracteolasin A (1) in Methanol

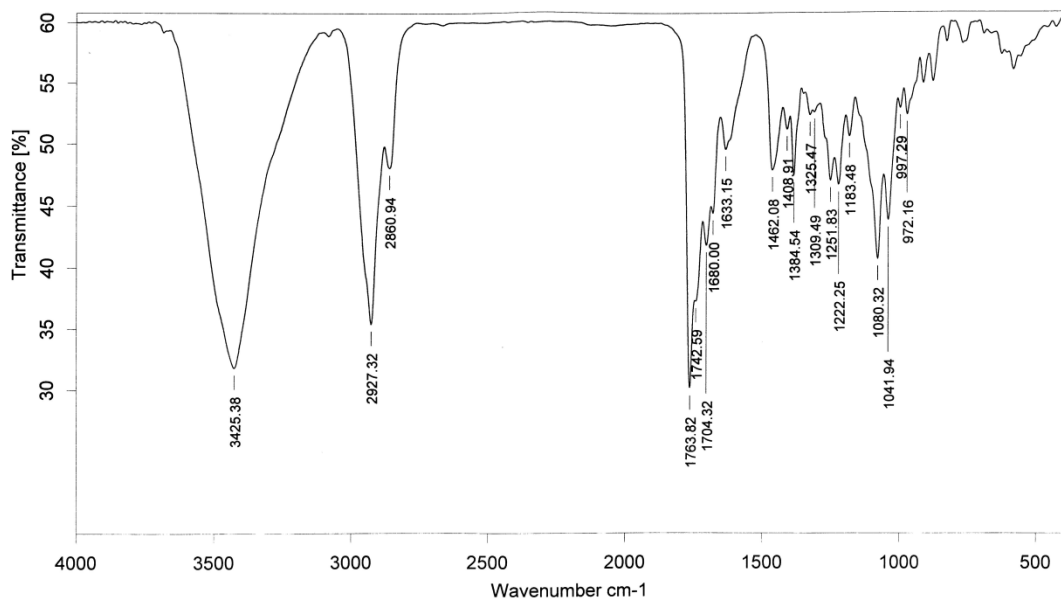

|                      |                                     |                          |
|----------------------|-------------------------------------|--------------------------|
| Sample : hyx51       | Frequency Range : 399.246 - 3996.32 | Measured on : 27/10/2015 |
| Technique : KBr压片    | Resolution : 4                      | Instrument : Tensor27    |
| Customer : 151027IR1 | Zerofilling : 2                     | Sample Scans : 16        |
|                      | Acquisition : Double Sided, For     |                          |

**S11 IR spectrum of Bisebracteolasin A (1)**



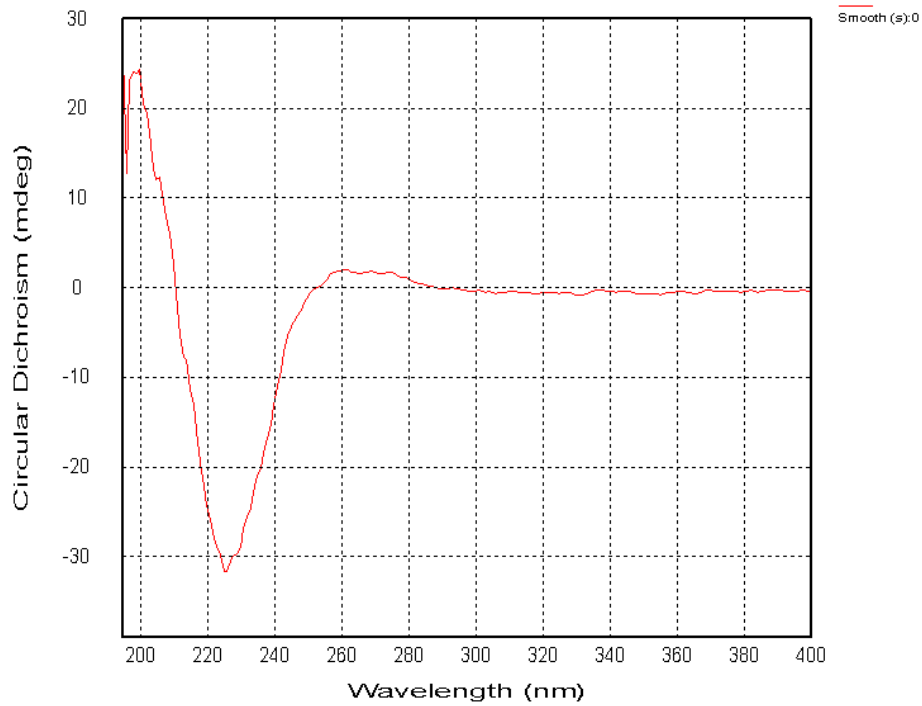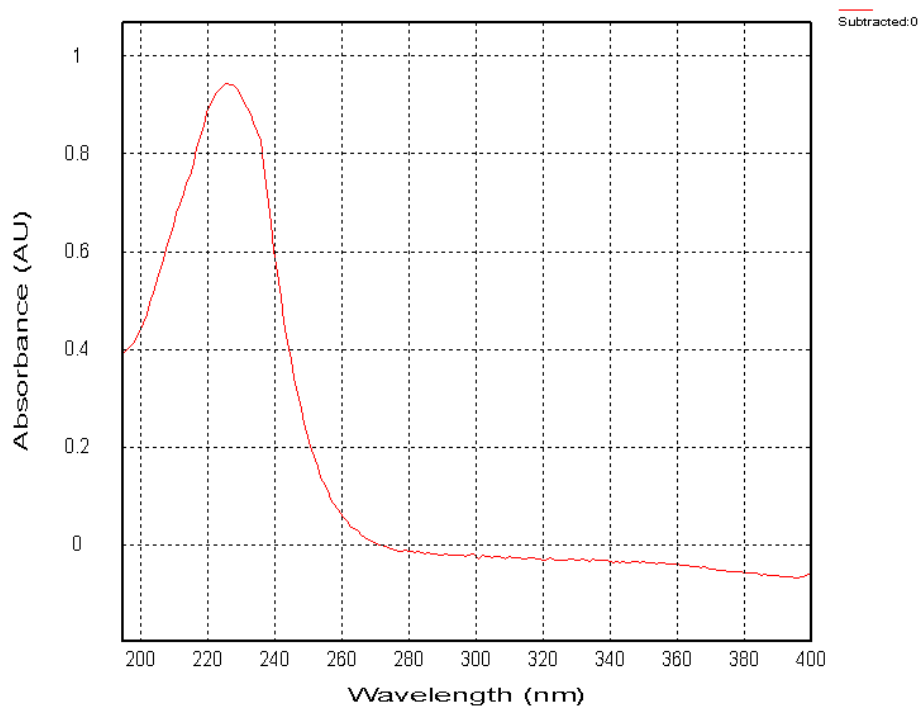

**S12 CD spectrum of Bisebracteolasin A (1)**

File: CD HYX51-1mm(195-400)17012310.dsx

ProBinaryX

Attributes :

- Time Stamp :Mon Jan 23 20:34:24 2017

- File ID : {52617AB3-225B-4077-9EBC-D136496DDA35}

- Is CFR Compliant : false

- Original unaltered data

Remarks:

- HV (CDDC channel): 0 v

- Time per point: 1 s

- Description: Sample 1

- Concentration: 0.4256 mg/mL MeOH

- Pathlength: 1 mm

Settings:

- Time-per-point: 1s (25us x 40000)

- Wavelength: 195nm - 400nm

- Step Size: 1nm

- Bandwidth: 1nm

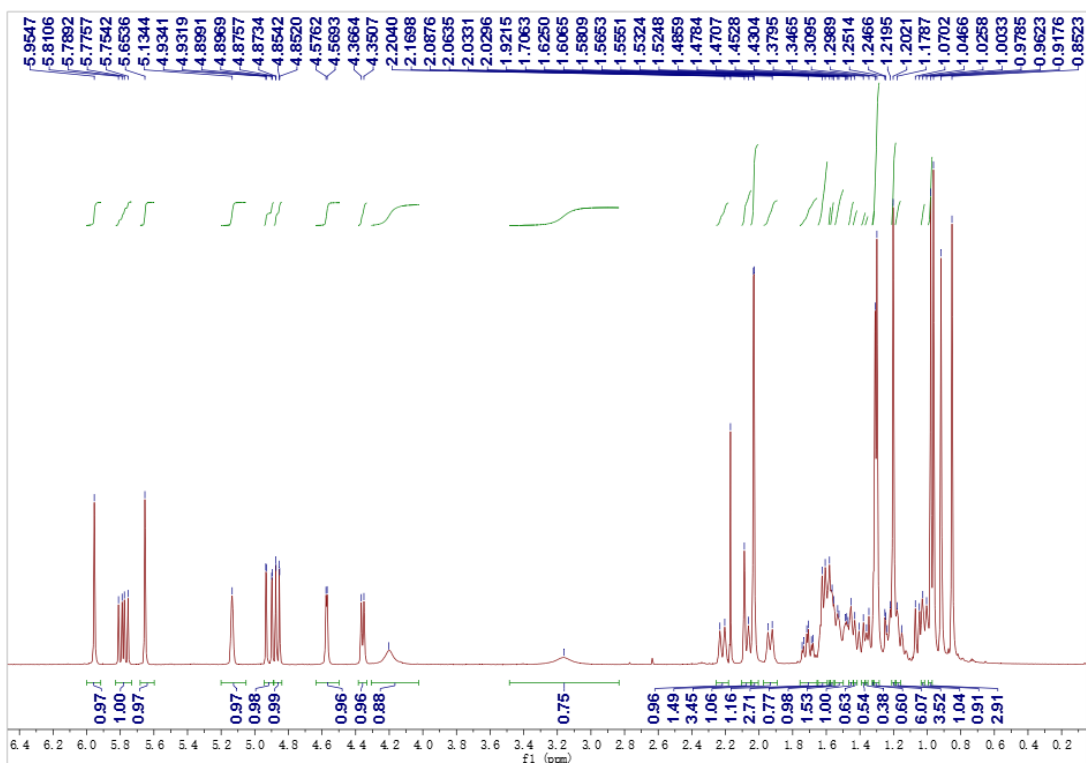

**S13 <sup>1</sup>H NMR spectrum of Bisebracteolasin B (2) in CDCl<sub>3</sub>-d<sub>1</sub>**

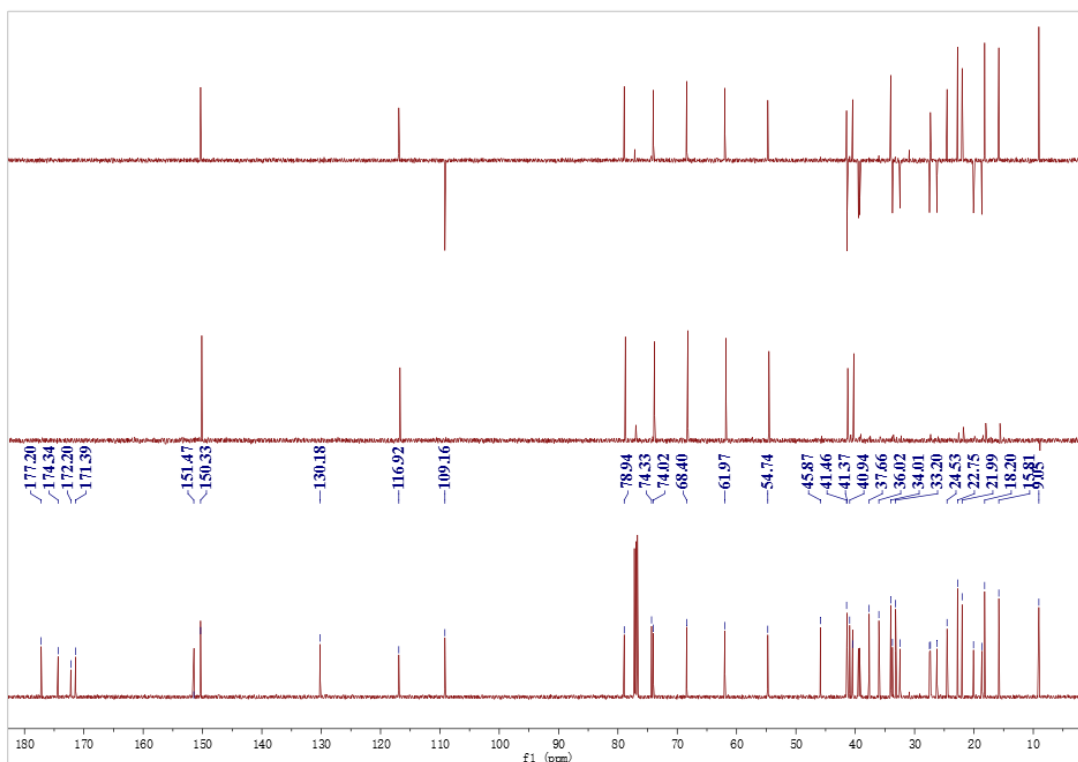

**S14 <sup>13</sup>C NMR spectrum of Bisebracteolasin B (2) in CDCl<sub>3</sub>-d<sub>1</sub>**

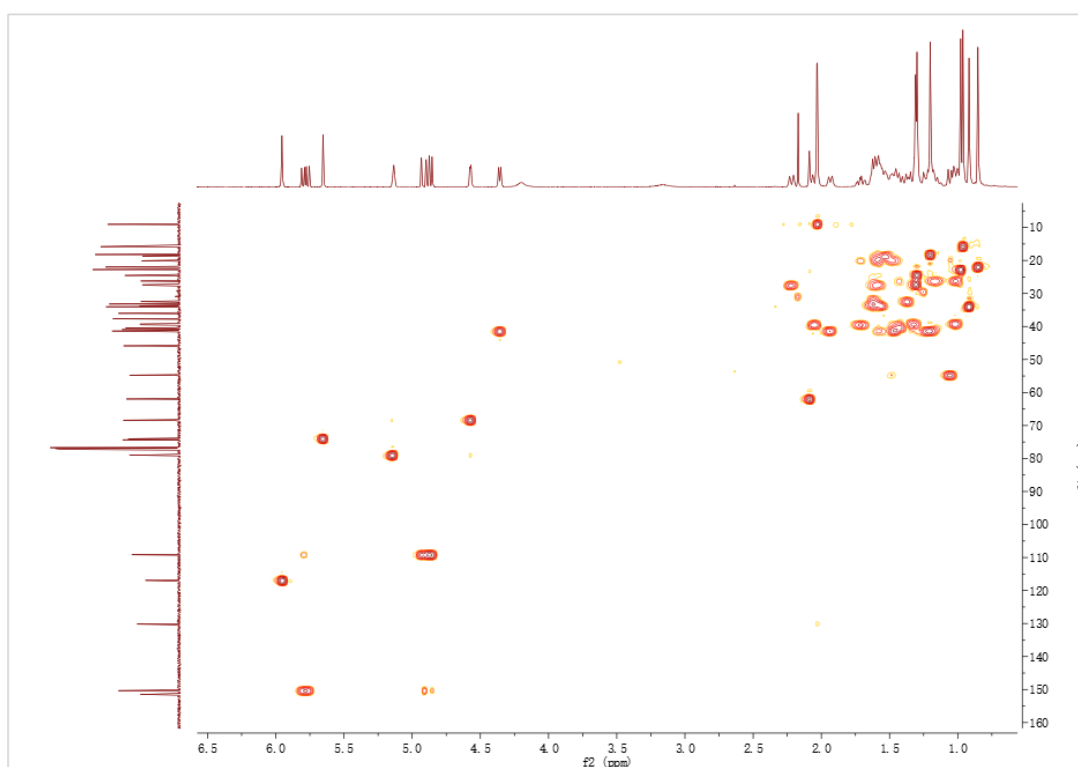

**S15 HSQC spectrum of Bisebracteolasin B (2) in  $\text{CDCl}_3-d_1$**

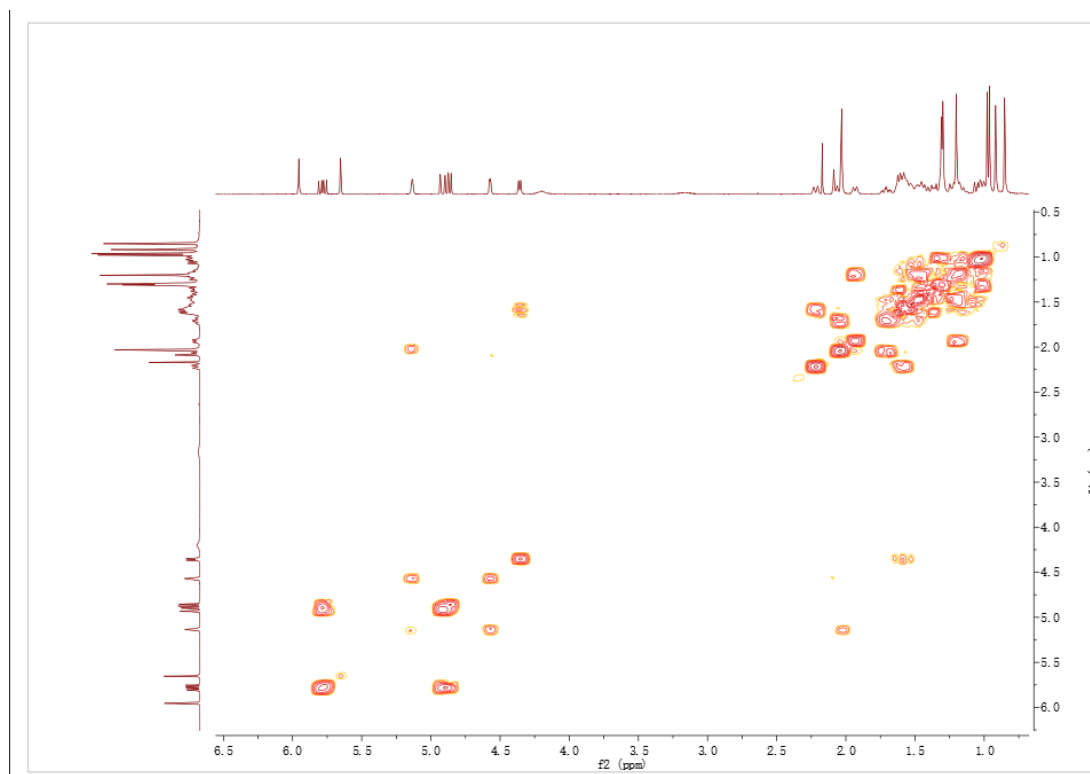

**S16 COSY spectrum of Bisebracteolasin B (2) in  $\text{CDCl}_3-d_1$**

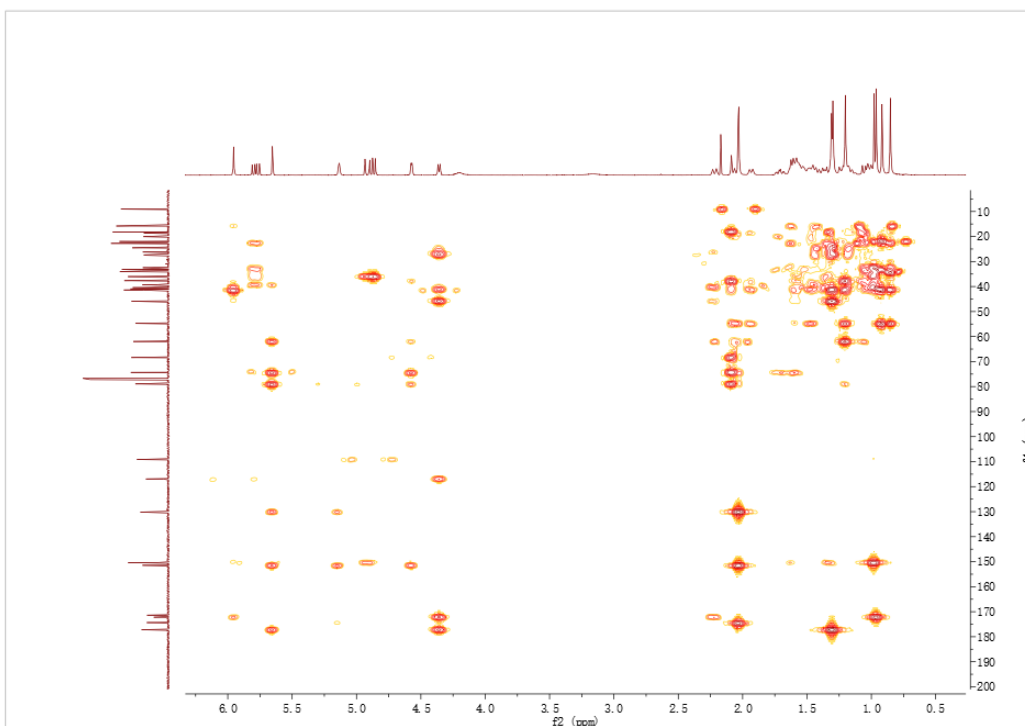

**S17 HMBC spectrum of Bisebracteolasin B (2) in  $\text{CDCl}_3-d_1$**

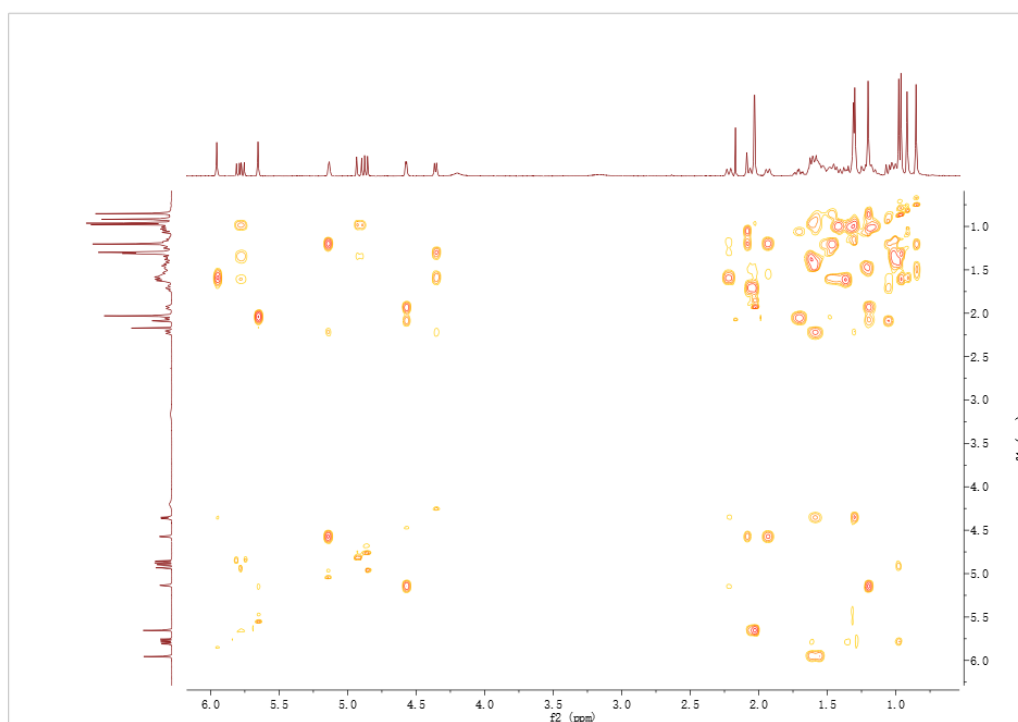

**S18 ROESY spectrum of Bisebracteolasin B (2) in  $\text{CDCl}_3-d_1$**

## Qualitative Analysis Report

|                               |                      |                      |                        |
|-------------------------------|----------------------|----------------------|------------------------|
| <b>Data Filename</b>          | hyx46.d              | <b>Sample Name</b>   | hyx46                  |
| <b>Sample Type</b>            | Sample               | <b>Position</b>      | P1-B7                  |
| <b>Instrument Name</b>        | Instrument 1         | <b>User Name</b>     |                        |
| <b>Acq Method</b>             | SIBU.m               | <b>Acquired Time</b> | 10/14/2015 10:34:23 AM |
| <b>IRM Calibration Status</b> | ████████████████████ | <b>DA Method</b>     | ESI+.m                 |
| <b>Comment</b>                |                      |                      |                        |

**Sample Group** Info.  
**Acquisition SW** 6200 series TOF/6500 series  
**Version** Q-TOF B.05.01 (B5125.2)

### User Spectra

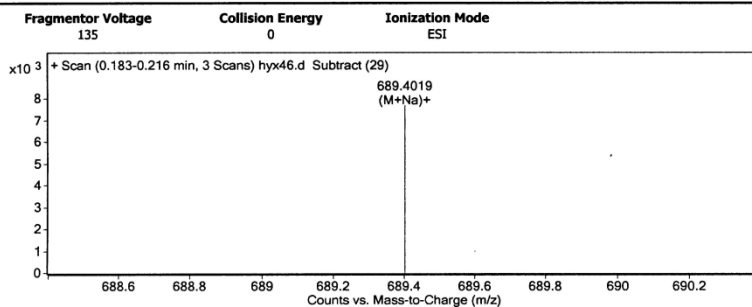

### Peak List

| m/z      | z | Abund   | Formula    | Ion     |
|----------|---|---------|------------|---------|
| 274.2741 | 1 | 7858.6  |            |         |
| 302.3063 | 1 | 2703.21 |            |         |
| 318.3004 | 1 | 8765.95 |            |         |
| 362.3265 |   | 2792.71 |            |         |
| 684.4473 | 1 | 5172.6  |            |         |
| 689.4019 | 1 | 7675.16 | C40 H58 O8 | (M+Na)+ |
| 690.4065 | 1 | 3165.63 | C40 H58 O8 | (M+Na)+ |
| 705.3745 | 1 | 3202.07 |            |         |

### Formula Calculator Element Limits

| Element | Min | Max |
|---------|-----|-----|
| C       | 3   | 60  |
| H       | 0   | 120 |
| O       | 0   | 30  |

### Formula Calculator Results

| Formula    | CalculatedMass | CalculatedMz | Mz       | Diff. (mDa) | Diff. (ppm) | DBE     |
|------------|----------------|--------------|----------|-------------|-------------|---------|
| C40 H58 O8 | 666.4132       | 689.4024     | 689.4019 | 0.1         | 0.2         | 12.0000 |

--- End Of Report ---

## S19 HRESIMS spectrums of Bisebracteolasin B (2)

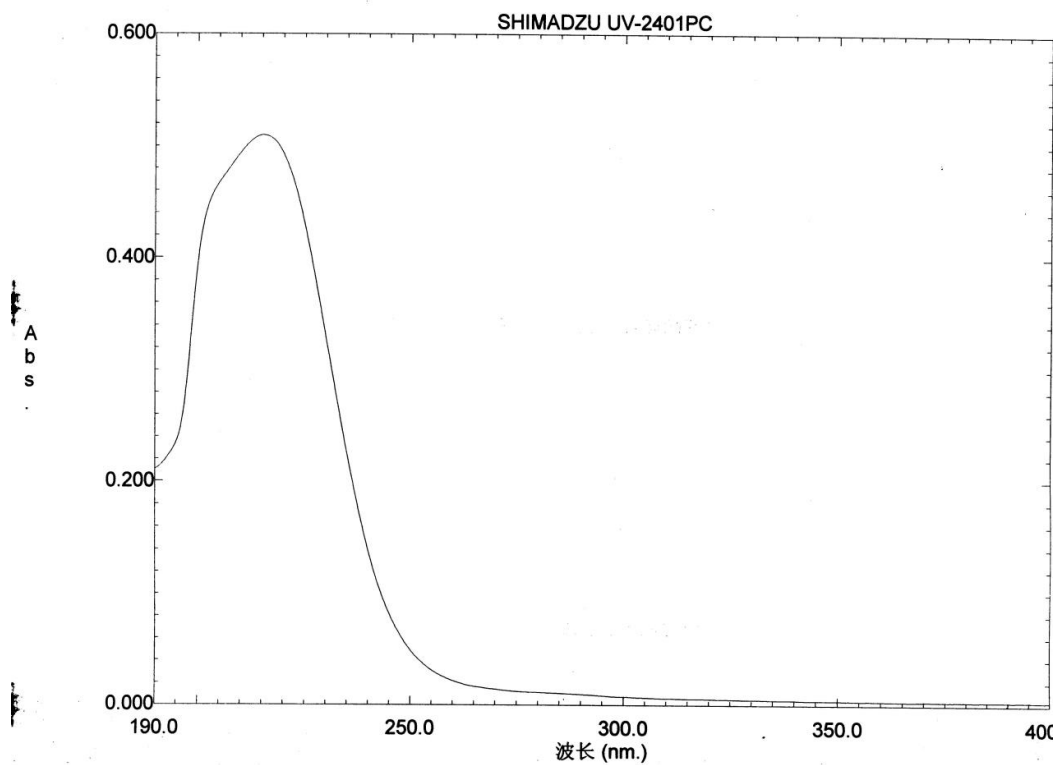

文件名: HYX46

HYX46 ———

创建于: 14:07 15-10-21  
数据: 原始

样品浓度: 0.0156毫克/毫升  
溶剂: 甲醇

测量模式: Abs.  
扫描速度: 中速  
狭缝: 5.0  
采样间隔: 0.2

| 否. | 波长 (nm.) | Abs.   |
|----|----------|--------|
| 1  | 215.40   | 0.5097 |

### S20 UV spectrum of Bisebracteolasin B (2) in Methanol

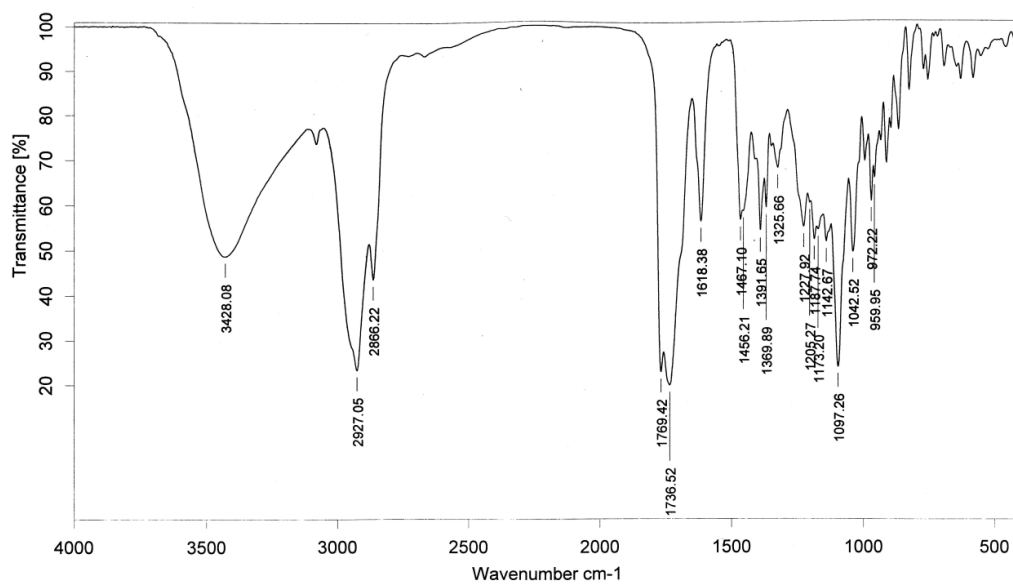

|                      |                                     |                          |
|----------------------|-------------------------------------|--------------------------|
| Sample : hyx46       | Frequency Range : 399.246 - 3996.32 | Measured on : 27/10/2015 |
| Technique : KBr压片    | Resolution : 4                      | Instrument : Tensor27    |
| Customer : 151027IR0 | Zerofilling : 2                     | Sample Scans : 16        |
|                      | Acquisition : Double Sided,For      |                          |

**S21 IR spectrum of Bisebracteolasin B (2)**



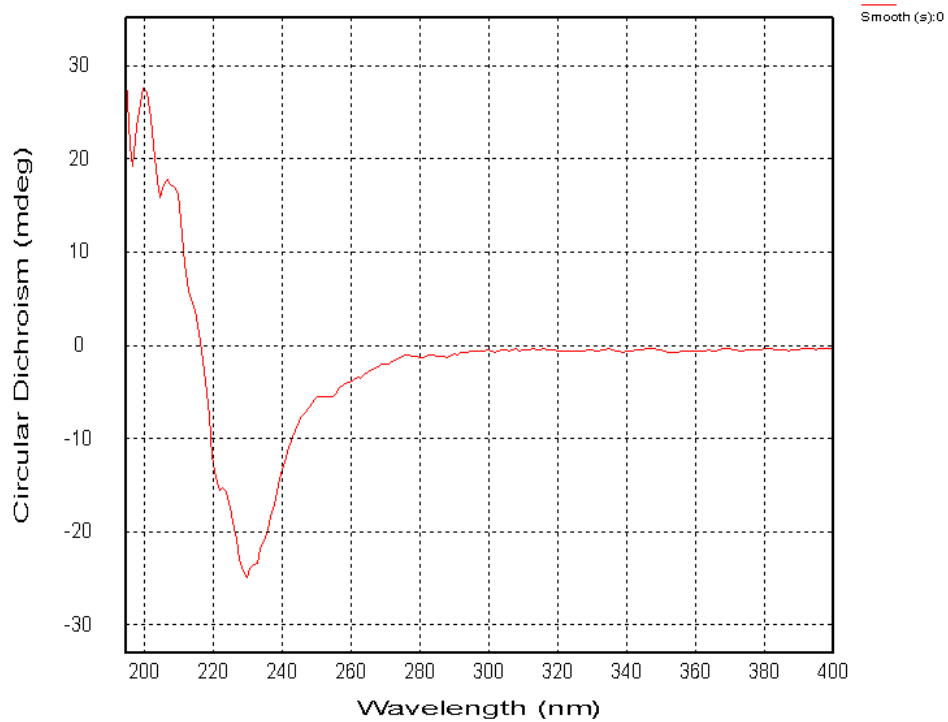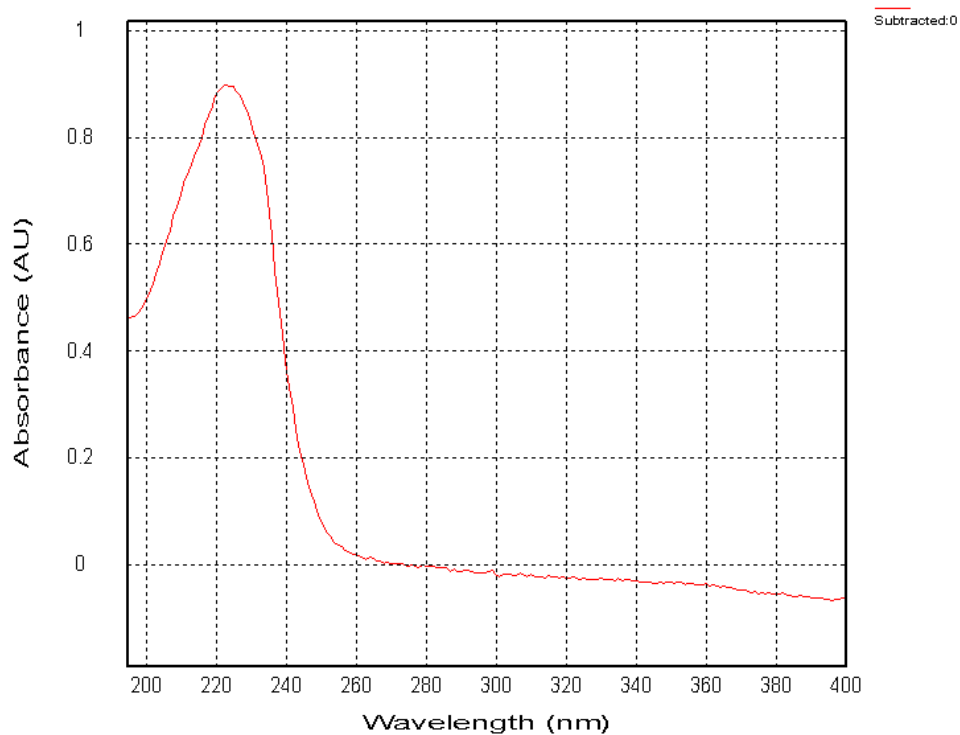

### S22 CD spectrum of Bisebracteolasin B (2)

File: CD HYG46-1mm(195-400)17012309.dsx

ProBinaryX

Attributes :

- Time Stamp :Mon Jan 23 20:14:15 2017

- File ID : {ACBE4E12-8CEF-4e92-B362-9DEDC7794EF8}

- Is CFR Compliant : false

- Original unaltered data

Remarks:

- HV (CDDC channel): 0 v

- Time per point: 1 s

- Description: Sample 1

- Concentration: 0.2448mg/mL MeOH

- Pathlength: 1 mm

Settings:

- Time-per-point: 1s (25us x 40000)

- Wavelength: 195nm - 400nm

- Step Size: 1nm

- Bandwidth: 1nm
